# Supplementary material for: TP53 Mutations in AML Patients Are Associated with Dismal Clinical Outcome Irrespective of Frontline Induction Regimen and Allogeneic Hematopoietic Cell Transplantation
Source: MDPI journal article supplement (doi:10.3390/cancers15123210), 2023-06-16
Supplement: s1 [file s1]

## **Supplementary Materials**

### **Intensive induction dosage**

FLAG-IDA: G-CSF 300 µg daily day 0-5, Idarubicin 10 mg/m<sup>2</sup> daily day 1-3, Fludarabine 30 mg/m<sup>2</sup> daily day 1-5, Cytarabine 2 g/m<sup>2</sup> daily day 1-5

7+3: Daunorubicin 60 mg/m<sup>2</sup> daily day 1-3, Cytarabine 200 mg/m<sup>2</sup> daily day 1-7, Cytarabine dose reduction to 100 mg/m<sup>2</sup> for patients age > 60 years

CPX-351 (Vyxeos): 44 mg/m<sup>2</sup> day 1, 3 and 5

**Supplementary Figure S1.** (A) OS and (B) EFS of treated *TP53*<sup>MUT</sup> patients stratified by presence or absence of *TP53* mutation within its DNA binding domain (amino acids 95-288).

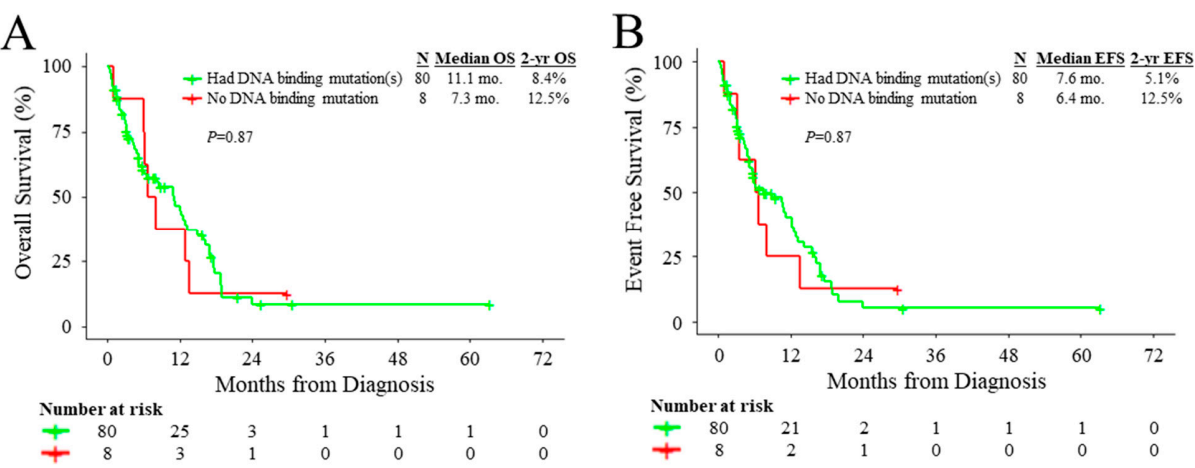

**Supplementary Figure S2.** (A) OS and (B) EFS of all treated *TP53*<sup>MUT</sup> patients stratified by allo-HCT status.

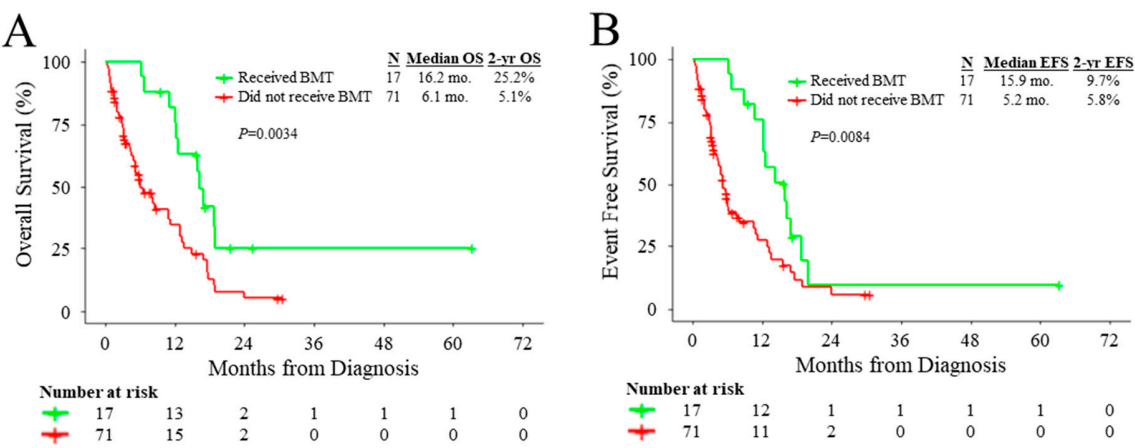

**Supplementary Figure S3.** (A-B) Landmark analysis for OS and EFS for patients with low *TP53* VAF (< 45%) stratified by allo-HCT status. (C-D) Landmark analysis for OS and EFS for patients with high *TP53* VAF ( $\geq$  45%) stratified by allo-HCT status.

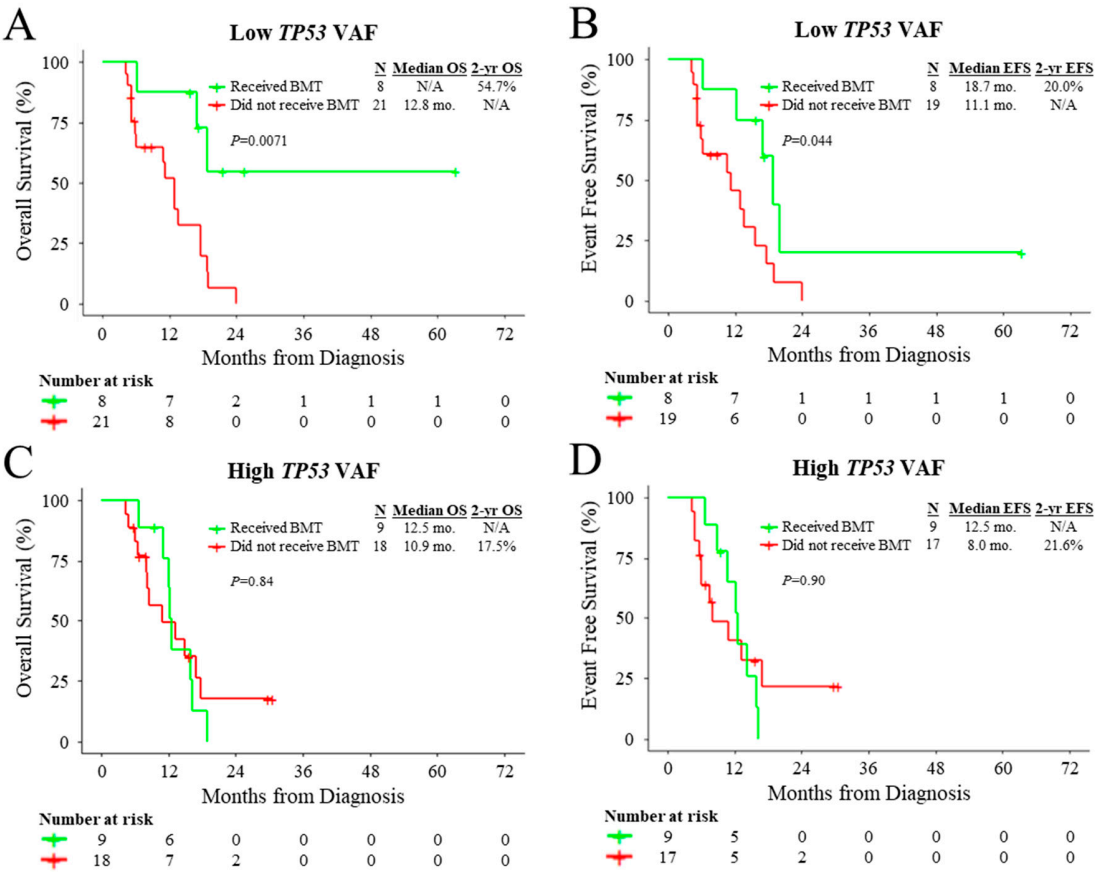

| Supplementary Table S1. Gene panel for targeted sequencing |                          |
|------------------------------------------------------------|--------------------------|
| Complete coding region coverage (13/41)                    | Hotspot coverage (28/41) |
| <i>BCOR</i>                                                | <i>ASXL1</i>             |
| <i>BCORL1</i>                                              | <i>BRAF</i>              |
| <i>CEBPA</i>                                               | <i>CALR</i>              |
| <i>CUX1</i>                                                | <i>CBL</i>               |
| <i>DNMT3A</i>                                              | <i>CSF3R</i>             |
| <i>ETV6</i>                                                | <i>FBXW7</i>             |
| <i>EZH2</i>                                                | <i>FLT3</i>              |
| <i>IKZF1</i>                                               | <i>GATA2</i>             |
| <i>PHF6</i>                                                | <i>GNAS</i>              |
| <i>RAD21</i>                                               | <i>IDH1</i>              |
| <i>RUNX1</i>                                               | <i>IDH2</i>              |
| <i>STAG2</i>                                               | <i>JAK2</i>              |
| <i>ZRSR2</i>                                               | <i>KIT</i>               |
|                                                            | <i>KMT2A</i>             |
|                                                            | <i>KRAS</i>              |
|                                                            | <i>MPL</i>               |
|                                                            | <i>MYD88</i>             |
|                                                            | <i>NOTCH1</i>            |
|                                                            | <i>NPM1</i>              |
|                                                            | <i>NRAS</i>              |
|                                                            | <i>PTPN11</i>            |
|                                                            | <i>SETBP1</i>            |
|                                                            | <i>SF3B1</i>             |
|                                                            | <i>SRSF2</i>             |
|                                                            | <i>TET2</i>              |
|                                                            | <i>TP53</i>              |
|                                                            | <i>U2AF1</i>             |
|                                                            | <i>WT1</i>               |

| Supplementary Table S2. Exon coverage for hotspot genes |                 |
|---------------------------------------------------------|-----------------|
| Gene                                                    | Exon Coverage   |
| <i>ASXL1</i>                                            | 12              |
| <i>BRAF</i>                                             | 15              |
| <i>CALR</i>                                             | 9               |
| <i>CBL</i>                                              | 8, 9            |
| <i>CSF3R</i>                                            | 14-17           |
| <i>FBXW7</i>                                            | 9-11            |
| <i>FLT3</i>                                             | 14, 15, 20      |
| <i>GATA2</i>                                            | 2-6             |
| <i>GNAS</i>                                             | 8, 9            |
| <i>IDH1</i>                                             | 4               |
| <i>IDH2</i>                                             | 4               |
| <i>JAK2</i>                                             | 12, 14          |
| <i>KIT</i>                                              | 2, 8-11, 13, 17 |
| <i>KMT2A</i>                                            | 5-8             |
| <i>KRAS</i>                                             | 2,3             |
| <i>MPL</i>                                              | 10              |
| <i>MYD88</i>                                            | 3-5             |
| <i>NOTCH1</i>                                           | 26-28, 34       |
| <i>NPM1</i>                                             | 12              |
| <i>NRAS</i>                                             | 2, 3            |
| <i>PTPN11</i>                                           | 3, 13           |
| <i>SETBP1</i>                                           | 4               |
| <i>SF3B1</i>                                            | 13-16           |
| <i>SRSF2</i>                                            | 1               |
| <i>TET2</i>                                             | 3-11            |
| <i>TP53</i>                                             | 2-11            |
| <i>U2AF1</i>                                            | 2, 6            |
| <i>WT1</i>                                              | 7, 9            |

| <b>Supplemental Table S3. Summary of additional clinicopathological features</b> |           |
|----------------------------------------------------------------------------------|-----------|
| Clinical feature                                                                 |           |
| AML subtype (WHO-HAEM4), <i>n</i>                                                |           |
| AML with myelodysplasia-related changes                                          | 92        |
| Therapy-related AML                                                              | 13        |
| AML, NOS                                                                         | 3         |
| AML with mutated <i>NPM1</i>                                                     | 2         |
| AML with inv(3)(q21.3q26.2) or t(3;3)(q21.3;q26.2); <i>GATA2</i> , <i>MECOM</i>  | 1         |
| AML with inv(16)(p13.1q22) or t(16;16)(p13.1;q22); <i>CBFB-MYH11</i>             | 1         |
| AML with mutated <i>RUNX1</i> (provisional entity)                               | 1         |
| Co-mutations, <i>n</i> (VAF range)                                               |           |
| <i>DNMT3A</i>                                                                    | 17 (5-44) |
| <i>IDH1</i>                                                                      | 11 (6-39) |
| <i>TET2</i>                                                                      | 8 (5-46)  |
| <i>JAK2</i>                                                                      | 5 (7-48)  |
| <i>CEBPA</i>                                                                     | 4 (10-97) |
| <i>RUNX1</i>                                                                     | 4 (22-54) |
| <i>ASXL1</i>                                                                     | 4 (19-31) |
| <i>IDH2</i>                                                                      | 4 (36-44) |
| <i>BCOR</i>                                                                      | 3 (6-44)  |
| <i>CUX1</i>                                                                      | 3 (7-34)  |
| <i>NPM1</i>                                                                      | 3 (4-30)  |
| <i>NRAS</i>                                                                      | 3 (10-40) |
| <i>SF3B1</i>                                                                     | 3 (31-42) |
| <i>SRSF2</i>                                                                     | 3 (39-46) |
| <i>U2AF1</i>                                                                     | 3 (19-43) |
| <i>STAG2</i>                                                                     | 2 (18-29) |
| <i>CALR</i>                                                                      | 2 (15-32) |
| <i>FLT3</i>                                                                      | 2 (5-13)  |
| <i>KIT</i>                                                                       | 2 (24-49) |
| <i>KRAS</i>                                                                      | 2 (12-19) |
| <i>MPL</i>                                                                       | 2 (17-36) |
| <i>PTPN11</i>                                                                    | 2 (34-34) |
| <i>BCORL1</i>                                                                    | 1 (39)    |
| <i>ETV6</i>                                                                      | 1 (17)    |
| <i>EZH2</i>                                                                      | 1 (52)    |
| <i>CSF3R</i>                                                                     | 1 (5)     |
| <i>FBXW7</i>                                                                     | 1 (8)     |
| <i>GATA2</i>                                                                     | 1 (6)     |
| <i>GNAS</i>                                                                      | 1 (8)     |
| <i>NOTCH1</i>                                                                    | 1 (51)    |
| <i>WT1</i>                                                                       | 1 (54)    |
| Common cytogenetic abnormalities, <i>n</i>                                       |           |
| Complex karyotype                                                                | 95        |
| -5/del(5q)                                                                       | 69        |
| -7/del(7q)                                                                       | 52        |
| -17/del(17p)/dic(17p)                                                            | 49        |
